# Supplementary material for: Rapid and Sensitive Detection of an Intracellular Pathogen in Human Peripheral Leukocytes with Hybridizing Magnetic Relaxation Nanosensors
Source: PubMed Central journal article supplement (PMC3322147; doi:10.1371/journal.pone.0035326), 2012-04-09
Supplement: pone.0035326.s004.pdf [file pone.0035326.s004.pdf]

| DNA<br>(pg) | T2 (ms)      |              |              | Mean  |
|-------------|--------------|--------------|--------------|-------|
|             | Experiment A | Experiment B | Experiment C |       |
| 0           | 50.93        | 51.67        | 52.32        | 51.64 |
| 0.0076      | 68.25        | 66.84        | 67.90        | 67.66 |
| 0.076       | 65.71        | 66.63        | 66.16        | 66.17 |
| 0.76        | 61.97        | 62.59        | 62.78        | 62.45 |
| 7.6         | 62.31        | 61.68        | 62.11        | 62.03 |
| 33          | 59.98        | 60.33        | 60.52        | 60.28 |
| 76          | 58.26        | 58.84        | 58.49        | 58.53 |
| 330         | 57.74        | 57.36        | 57.67        | 57.59 |
| 760         | 57.14        | 57.29        | 56.96        | 57.13 |
| 3300        | 55.58        | 55.76        | 55.42        | 55.59 |
| 33000       | 53.17        | 53.33        | 53.21        | 53.24 |
