# Supplementary material for: Rapid and Sensitive Detection of an Intracellular Pathogen in Human Peripheral Leukocytes with Hybridizing Magnetic Relaxation Nanosensors
Source: PubMed Central journal article supplement (PMC3322147; doi:10.1371/journal.pone.0035326), 2012-04-09
Supplement: pone.0035326.s005.pdf [file pone.0035326.s005.pdf]

| MAP<br>(bacteria) | T2 (ms)      |              |              |        |
|-------------------|--------------|--------------|--------------|--------|
|                   | Experiment A | Experiment B | Experiment C | Mean   |
| 0                 | 51.74        | 50.86        | 51.12        | 51.24  |
| 1                 | 156.47       | 150.34       | 154.90       | 153.90 |
| 2                 | 138.81       | 140.50       | 143.78       | 141.03 |
| 17                | 139.22       | 135.36       | 137.59       | 137.39 |
| 168               | 120.45       | 124.82       | 122.29       | 122.52 |
| 1680              | 118.72       | 114.07       | 116.93       | 116.57 |
| 6710              | 101.33       | 100.43       | 98.55        | 100.10 |
| 16800             | 94.07        | 90.75        | 93.11        | 92.64  |
| 67100             | 86.52        | 88.72        | 89.84        | 88.36  |
| 168000            | 75.91        | 76.66        | 75.10        | 75.89  |
| 671000            | 75.42        | 75.06        | 73.98        | 74.82  |
