# Supplementary material for: Rapid and Sensitive Detection of an Intracellular Pathogen in Human Peripheral Leukocytes with Hybridizing Magnetic Relaxation Nanosensors
Source: PubMed Central journal article supplement (PMC3322147; doi:10.1371/journal.pone.0035326), 2012-04-09
Supplement: pone.0035326.s006.pdf [file pone.0035326.s006.pdf]

| Sample | Sex/Age | Diagnosis | Isolate's origin | hMRS    |
|--------|---------|-----------|------------------|---------|
| WCB1   | F/26    | CD        | Blood            | - (0/3) |
| WCB9   | M/22    | CD        | Blood            | - (0/3) |
| GN2'   | M/58    | CD        | Ileal biopsy     | + (3/3) |
| GN8'   | F/53    | CD        | Ileal biopsy     | - (0/3) |
| GN2    | M/58    | CD        | Blood            | + (3/3) |
| GN8    | F/53    | CD        | Blood            | + (3/3) |
| R16    | M/39    | Non-IBD   | Blood            | + (3/3) |
| R62B   | F/41    | CD        | Blood            | + (3/3) |
| R33B   | F/33    | CD        | Blood            | + (3/3) |
| WC3/1  | M/44    | CD        | Blood            | + (3/3) |
