# Supplementary material for: Rapid and Sensitive Detection of an Intracellular Pathogen in Human Peripheral Leukocytes with Hybridizing Magnetic Relaxation Nanosensors
Source: PubMed Central journal article supplement (PMC3322147; doi:10.1371/journal.pone.0035326), 2012-04-09
Supplement: pone.0035326.s007.pdf [file pone.0035326.s007.pdf]

| Sample | Sex/Age | Diagnosis | Direct nPCR | hMRS    |                  |                |
|--------|---------|-----------|-------------|---------|------------------|----------------|
|        |         |           |             | MAP     | $\Delta T2$ (ms) | MAP (bacteria) |
| S1     | F/32    | CD        | +           | + (3/3) | 11.2             | 277            |
| S2     | M/44    | CD        | +           | + (3/3) | 2.2              | 3760791        |
| S3     | M/77    | CD        | +           | + (3/3) | 15.3             | 4              |
| S4     | F/70    | CD        | +           | + (3/3) | 6.3              | 49844          |
| S5     | F/58    | CD        | +           | + (3/3) | 4.4              | 400959         |
| S6     | F/20    | CD        | +           | + (3/3) | 10.6             | 564            |
| S7     | M/50    | CD        | -           | - (0/3) | 0.1              | 0              |
| S8     | M/32    | Healthy   | -           | - (0/3) | 0.1              | 0              |
| S9     | M/30    | CD        | -           | - (0/3) | 0.2              | 0              |
| S10    | F/30    | CD        | -           | - (0/3) | 0.3              | 0              |
| S11    | M/60    | CD        | +           | + (3/3) | 8.9              | 3414           |
| S12    | F/46    | Healthy   | +           | + (3/3) | 8.7              | 4002           |
| S13    | F/34    | CD        | +           | + (3/3) | 7.2              | 19826          |
| S14    | F/44    | CD        | +           | + (3/3) | 3.1              | 1449066        |
| S15    | M/29    | Healthy   | -           | - (0/3) | 1.3              | 0              |
| S16    | M/46    | CD        | +           | + (3/3) | 6.4              | 47272          |
| S17    | M/65    | Healthy   | +           | + (3/3) | 8.4              | 5348           |
| S18    | F/31    | CD        | +           | + (3/3) | 8.7              | 4220           |
| S19    | F/40    | CD        | +           | + (3/3) | 7.6              | 12826          |
| S20    | F/33    | CD        | +           | + (3/3) | 7.3              | 18214          |
| S21    | F/20    | CD        | +           | + (3/3) | 6.5              | 40754          |
| S22    | F/55    | Healthy   | +           | + (3/3) | 9.4              | 1947           |
| S23    | M/44    | Healthy   | +           | + (3/3) | 10.4             | 633            |
| S24    | F/35    | CD        | +           | + (3/3) | 6.5              | 42972          |
| S25    | F/59    | CD        | +           | + (3/3) | 6.3              | 53682          |
| S26    | F/25    | Healthy   | +           | + (3/3) | 11.5             | 213            |
| S27    | F/42    | Healthy   | +           | + (3/3) | 5.7              | 94133          |
| S28    | F/18    | CD        | +           | + (3/3) | 4.0              | 576373         |
| S29    | F/27    | CD        | +           | + (3/3) | 3.9              | 654529         |
| S30    | M/22    | Healthy   | +           | + (3/3) | 12.5             | 74             |
| S31    | F/64    | CD        | +           | + (3/3) | 1.6              | 7568667        |
| S32    | M/19    | CD        | +           | + (3/3) | 1.5              | 7896377        |
| S33    | F/48    | Healthy   | +           | + (3/3) | 12.0             | 128            |
| S34    | F/31    | Healthy   | +           | + (3/3) | 2.1              | 4408705        |

**Supplementary Table S4**
